# Supplementary material for: ABCC3 Expressed by CD56dim CD16+ NK Cells Predicts Response in Glioblastoma Patients Treated with Combined Chemotherapy and Dendritic Cell Immunotherapy
Source: PubMed Central journal article supplement (PMC6928625; doi:10.3390/ijms20235886), 2019-11-23
Supplement: ijms-20-05886-s001.pdf [file ijms-20-05886-s001.pdf]

**Figure S1. NK cells activation lasts over time (after the end of the treatment in patients PFS > 12 only**

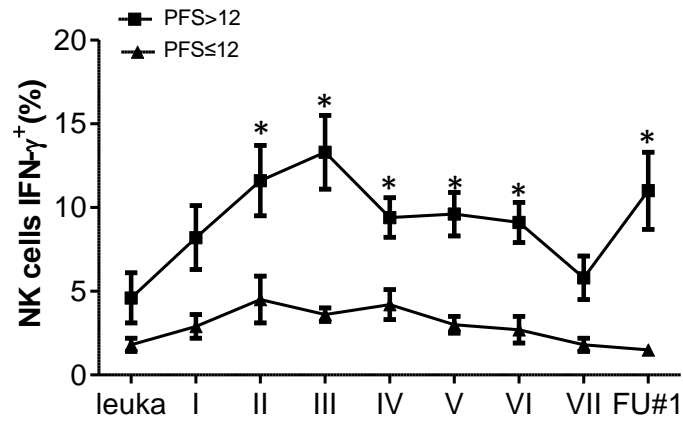

Time course of NK cells expressing IFN- $\gamma$  evaluated by intracellular staining and flow cytometry. Patients were divided in surviving more than 12 months without disease progression (PFS > 12, n=14), and PFS  $\leq$  12 (n=16). A significant expansion of NK cells expressing IFN- $\gamma$  was evident in patients PFS > 12 only, already after the first vaccination (indicated as I in the graph), persisting during the treatment and at the follow-up (FU) (\*  $p < 0.01$  vs. leukapheresis [leuka]).

**Table S1. Frequency of rs35467079 SNP in GBM patients**

| NK cell Response | Number of patients | Frequency (%) |             |
|------------------|--------------------|---------------|-------------|
|                  |                    | Wt            | DelC        |
| NO               | 14                 | 71.4 (n=10)   | 28.6 (n=4)  |
| YES              | 16                 | 18.8 (n=3)    | 81.2 (n=13) |
